# Supplementary material for: Promising Outcomes of Topical Tacrolimus Treatment for Breast Cancer-Related Lymphedema – A Six-Month Follow-Up
Source: Research Square preprint supplement (doi:10.21203/rs.3.rs-6562893/v1), 2025-05-20
Supplement: Supplementary file 1 [file 54fa57a97970461cdc6afcc9.docx]

**Promising Outcomes of Topical Tacrolimus Treatment for Breast Cancer-Related Lymphedema – A Six-Month Follow-Up**

Frederik Gulmark Hansen1,2 ([0000-0002-4588-8053](https://orcid.org/0000-0002-4588-8053)) Mads Gustaf Jørgensen1,2 ([0000-0002-8755-3446](https://orcid.org/0000-0002-8755-3446)), Jørn Bo Thomsen1,2 ([0000-0002-7368-6133](https://orcid.org/0000-0002-7368-6133)), Jens Ahm Sørensen1,2 ([0000-0003-4903-0094](https://orcid.org/0000-0003-4903-0094))

1Research Unit for Plastic Surgery, Odense University Hospital, Odense, Denmark

2Clinical Institute, University of Southern Denmark, Odense, Denmark

**Corresponding author**: Frederik Gulmark Hansen

Research Unit for Plastic Surgery, Odense University Hospital

J.B. Winsløws vej 4, 5000 Odense C, Denmark

Tel: +45 6541 4326

e-mail: [Frederik.C.Gulmark.Hansen@rsyd.dk](mailto:Frederik.C.Gulmark.Hansen@rsyd.dk)

# Supplementary material

**Supplementary Table 1:** Concomitant Lymphedema Treatments Prior to and During the Trial

| Patient ID | Baseline Treatments | 6-Month Follow-up | 12-Month Follow-up |
| --- | --- | --- | --- |
| 1 | A, D, E, H | F | C2 |
| 2 | C1, D | D | D |
| 3 | C1, D, E | D, E | D, E |
| 4 | A, C1, D, E | D | D, E* |
| 5 | C1, D | D | D |
| 6 | C1, D | D | D |
| 7 | C1, D | D | None |
| 8 | C1, D, F, G | D | D |
| 9 | A, C1, D, G | D | D |
| 10 | None | D | D |
| 11 | C1, D, E | D, E | D, E, G |
| 12 | C1, D, E | B, D, E | D*, E* |
| 13 | A, D, E | D | None |
| 14 | A | None | None |
| 15 | C1, D, E | D, E | B, D, E* |
| 16 | C1, D, E | D, E | — |
| 17 | A, C1, D, E, F | A, D, E | A, D, E |
| 18 | A, C1, D | D | — |

**Abbreviations:** A: Manual lymphatic drainage; B: Physiotherapeutic exercise; C1: Previous physiotherapeutic bandaging; C2: Physiotherapeutic bandaging within the last year; D: Compression sleeve (arm); E: Compression sleeve (hand); F: Pneumatic compression; G: Night compression (arm); H: Chest compression (day).

Note: None of the patients required physiotherapeutic bandaging after the baseline consultation. An asterisk indicates that the concomitant treatment modality was used less frequently compared to baseline.
